# Supplementary material for: High performance electrocatalyst consisting of CoS nanoparticles on an organized mesoporous SnO2 film: its use as a counter electrode for Pt-free, dye-sensitized solar cells
Source: Royal Society of Chemistry journal article supplement (doi:10.1039/c4nr05779a), 2014-11-10
Supplement: c4nr05779a1.pdf [file c4nr05779a1.pdf]

## Supporting Information

### **High Performance Electrocatalyst Consisting of CoS Nanoparticles on an Organized Mesoporous SnO<sub>2</sub> Film: Use as Counter Electrodes for Pt-free, Dye-sensitized Solar Cells**

*Jung Tae Park,<sup>a,b</sup> Chang Soo Lee<sup>a</sup> and Jong Hak Kim<sup>a\*</sup>*

[\*] Prof. Jong Hak Kim

<sup>a</sup> Department of Chemical and Biomolecular Engineering, Yonsei University, 50 Yonsei-ro, Seodaemun-gu, Seoul 120-749, South Korea

<sup>b</sup> Department of Chemical Engineering, Massachusetts Institute of Technology, 77 Massachusetts Ave., 66-325, Cambridge, MA, 02139, USA

E-mail: [jonghak@yonsei.ac.kr](mailto:jonghak@yonsei.ac.kr) (Jong Hak Kim)

Prof. J.H. Kim: Tel: +82-2-2123-5757; Fax: +82-2-312-6401

**Figure S1.** TEM image of the CoS on om-SnO<sub>2</sub>/FTO counter electrode.

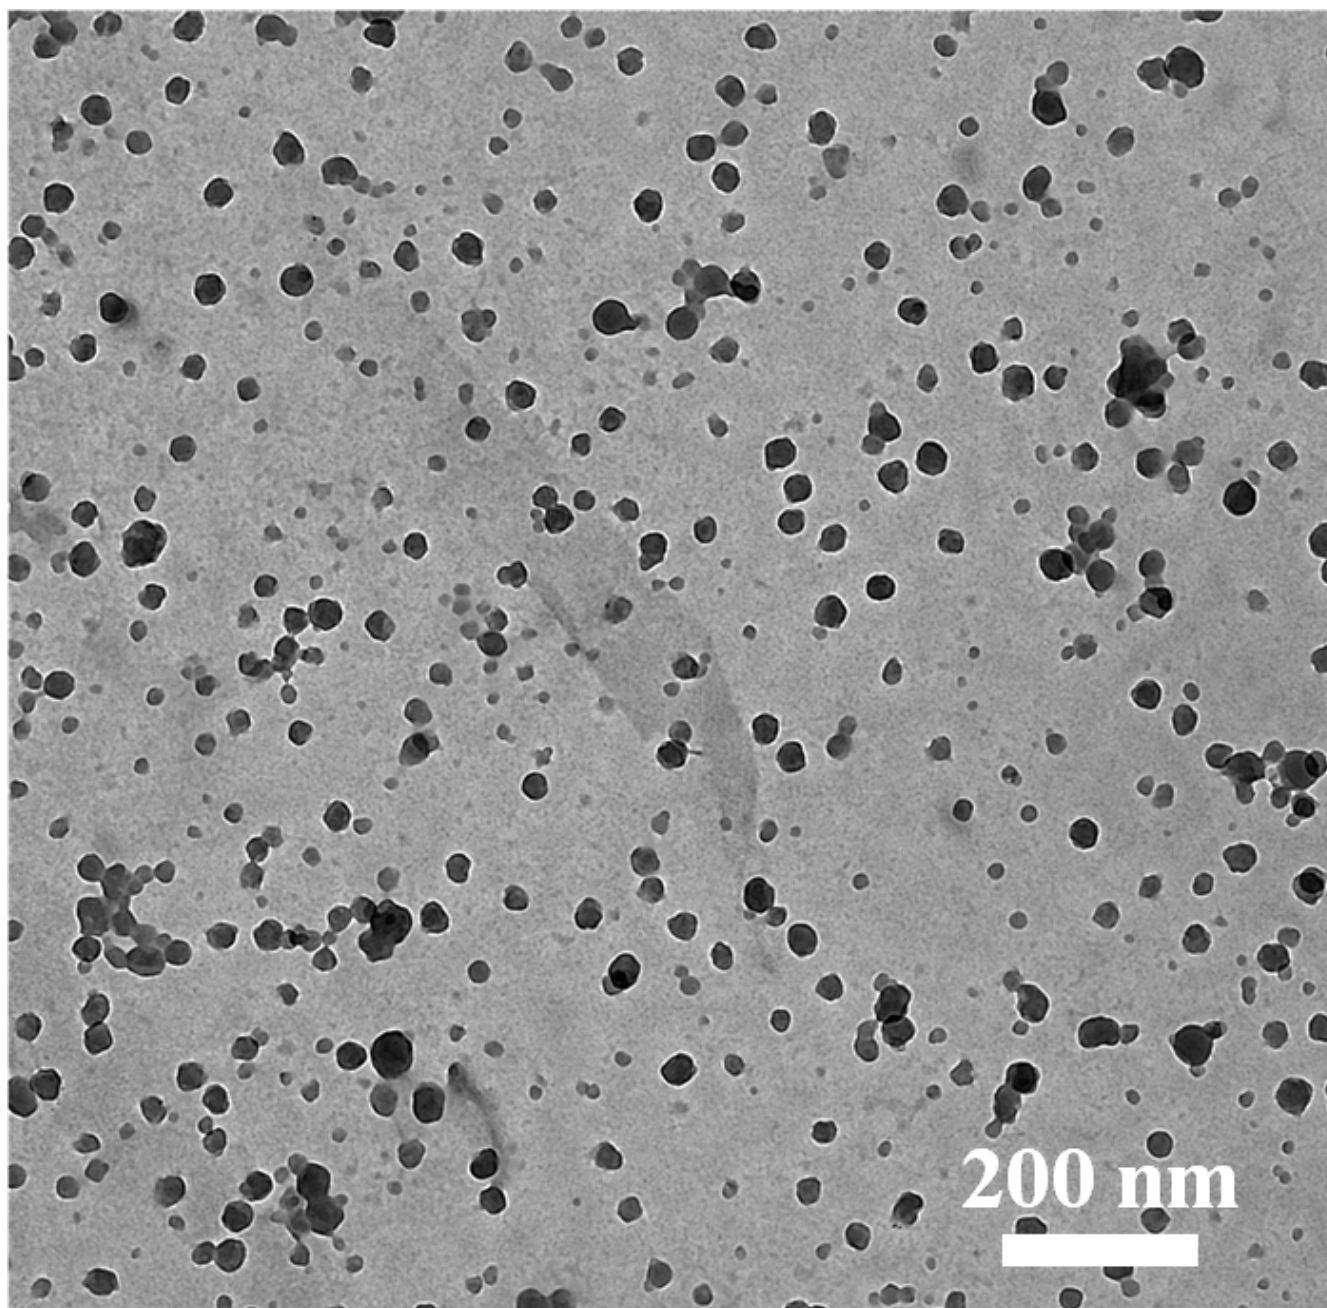

**Figure S2.** XPS profiles of (a) Co 2p, (b) S 2p regions for the CoS on om-SnO<sub>2</sub> counter electrode.

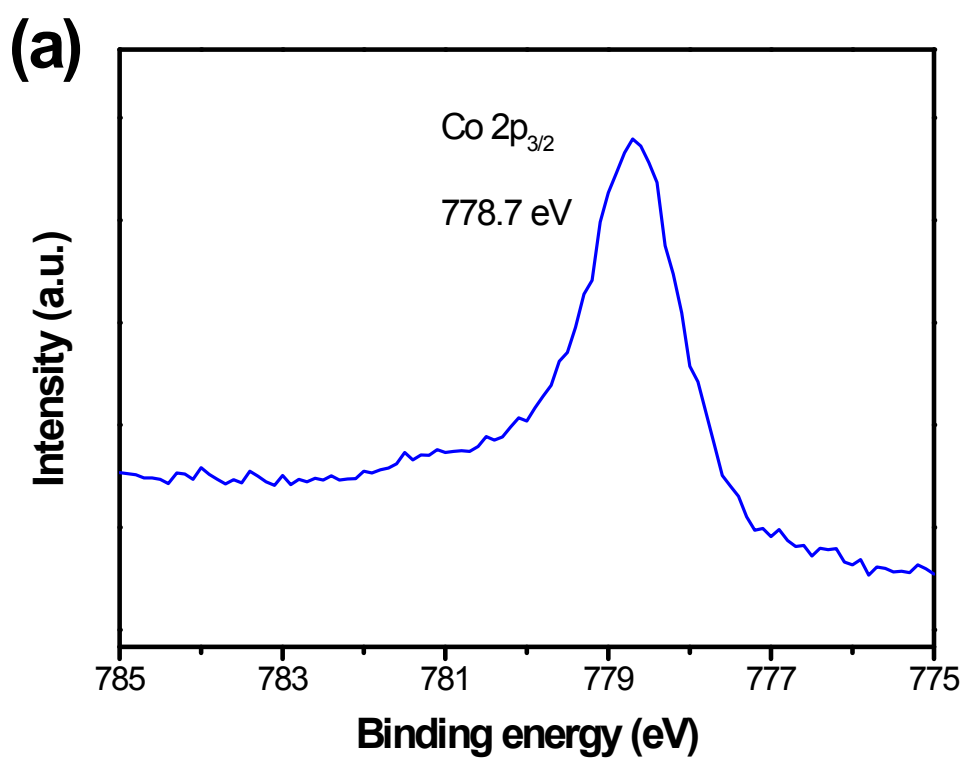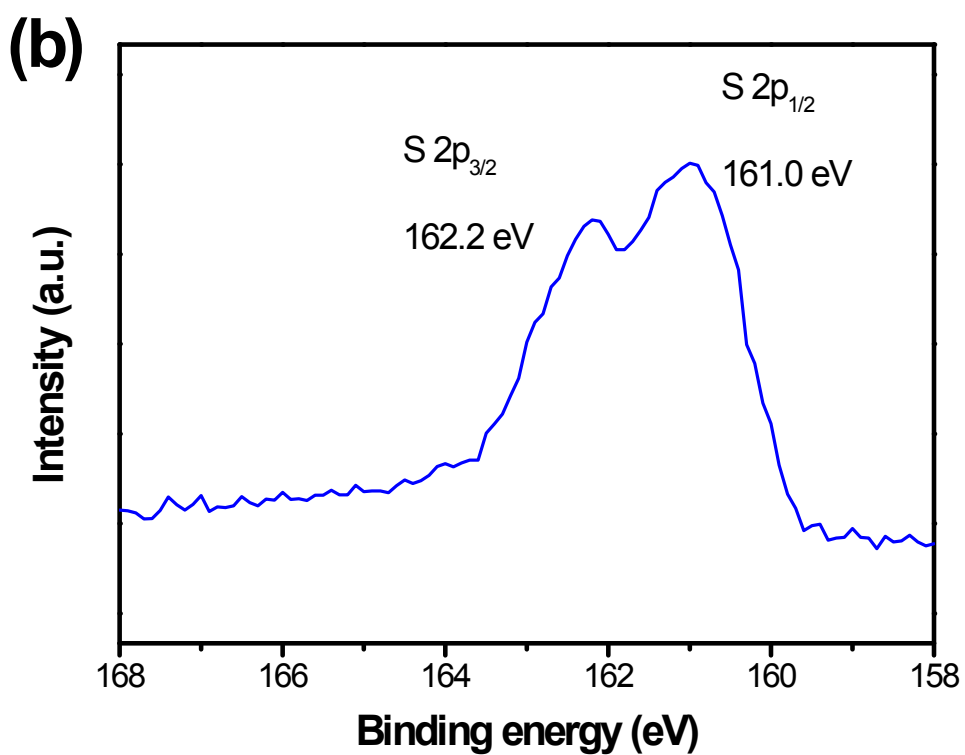

**Figure S3.** CV curves of the CoS and CoS on om-SnO<sub>2</sub> counter electrodes for the redox reactions of I<sub>2</sub>/I<sub>3</sub><sup>-</sup> and I<sup>-</sup>/I<sub>3</sub><sup>-</sup>. The scan rate was 50 mVs<sup>-1</sup>.

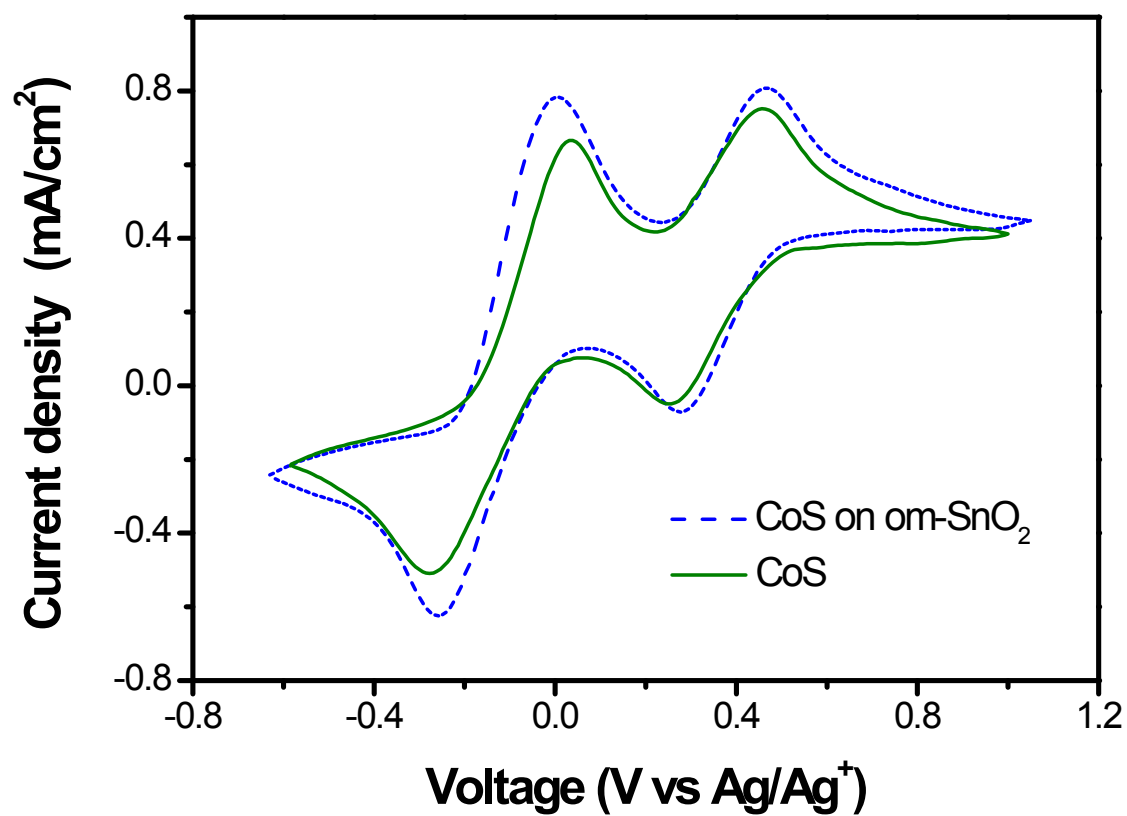

**Figure S4.** (a) Nyquist plots of DSSCs fabricated with a liquid electrolyte and different counter electrodes (CoS and CoS on om-SnO<sub>2</sub>) at the open circuit condition under simulated AM 1.5G one sun light.

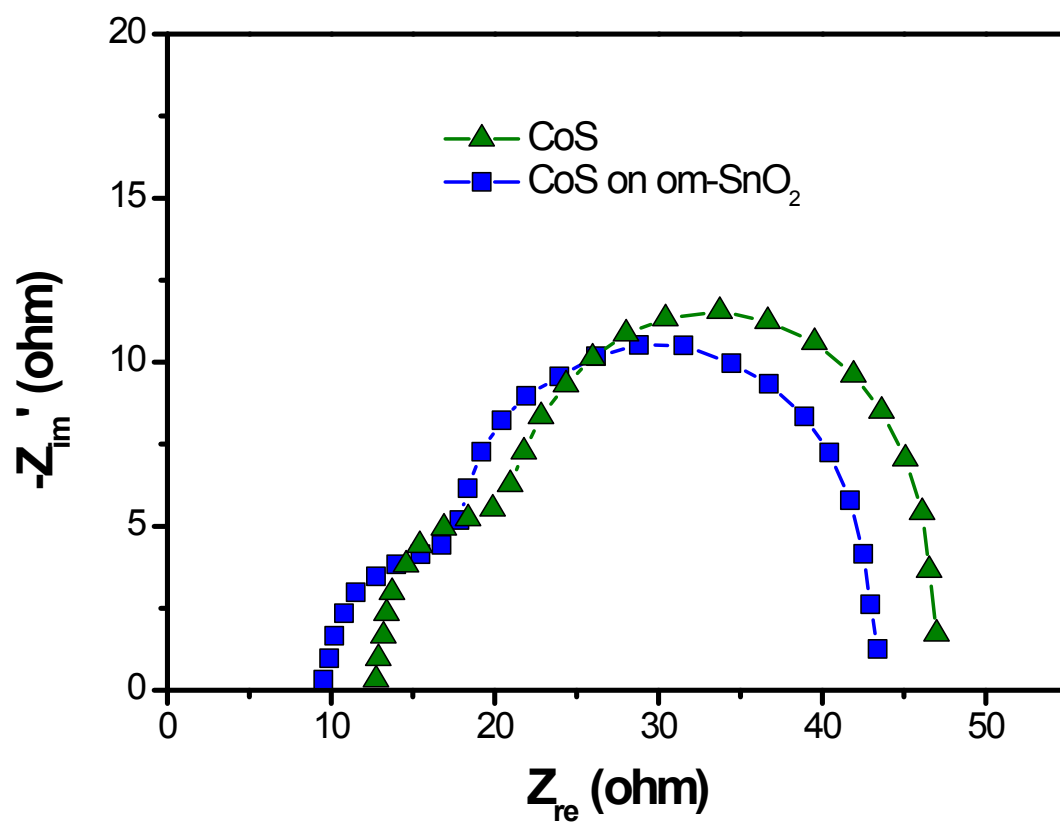

**Figure S5.**  $J$ - $V$  curves of ssDSSCs fabricated with a solid PEBII electrolyte and CoS on dense SnO<sub>2</sub> counter electrode under one sun illumination (AM 1.5, 100 mWcm<sup>-2</sup>).

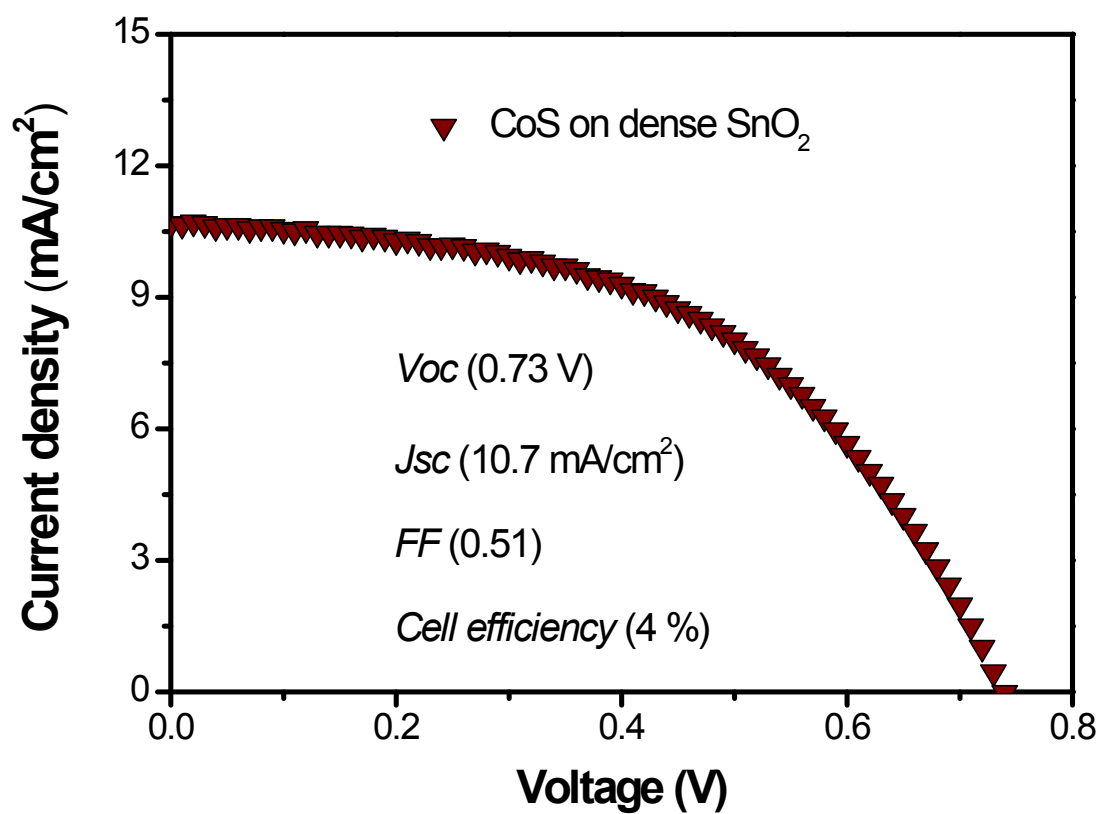

**Figure S6.** FE-SEM surface image of the dense SnO<sub>2</sub> platform.<sup>a</sup>

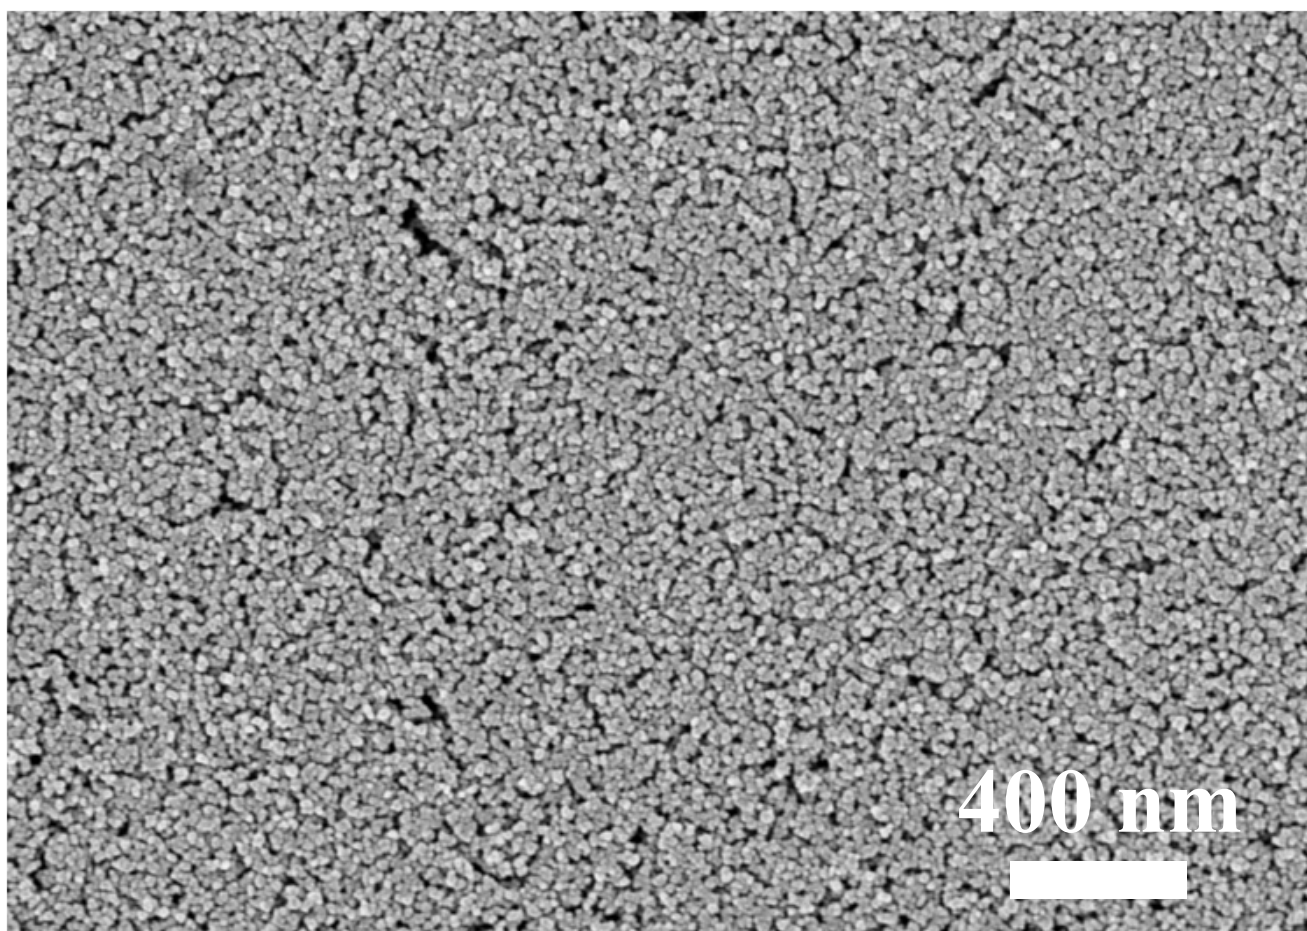

<sup>a</sup> A conducting FTO glass was sequentially cleaned in isopropanol and then in chloroform, and subsequently dried overnight in air before dense SnO<sub>2</sub> platform fabrication. Then, commercial available nanocrystalline SnO<sub>2</sub> based paste was spread on the FTO glass using the doctor blade technique and an adhesive tape spacer to achieve a flat and smooth surface. Finally, the films were calined at 450 °C for 30 min under air.
